# Supplementary material
Source: PubMed Central journal article supplement (PMC3519993)
Supplement: mt2012206x3.pdf [file mt2012206x3.pdf]

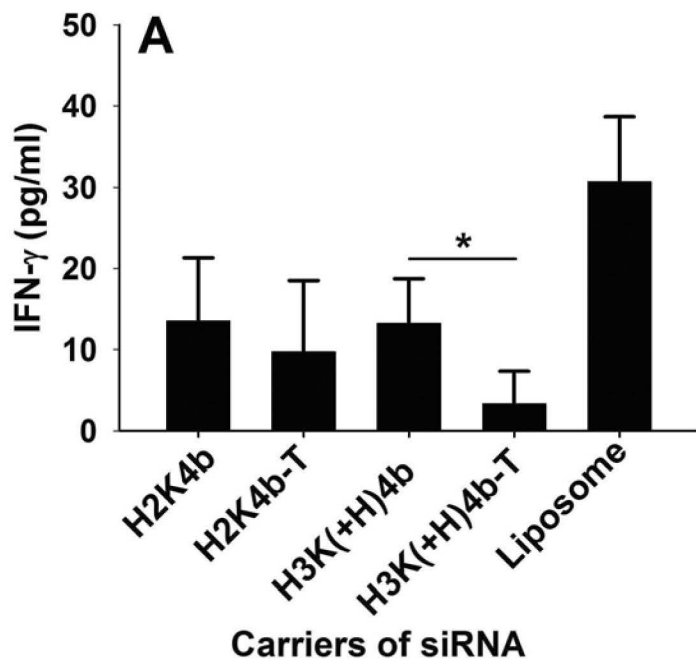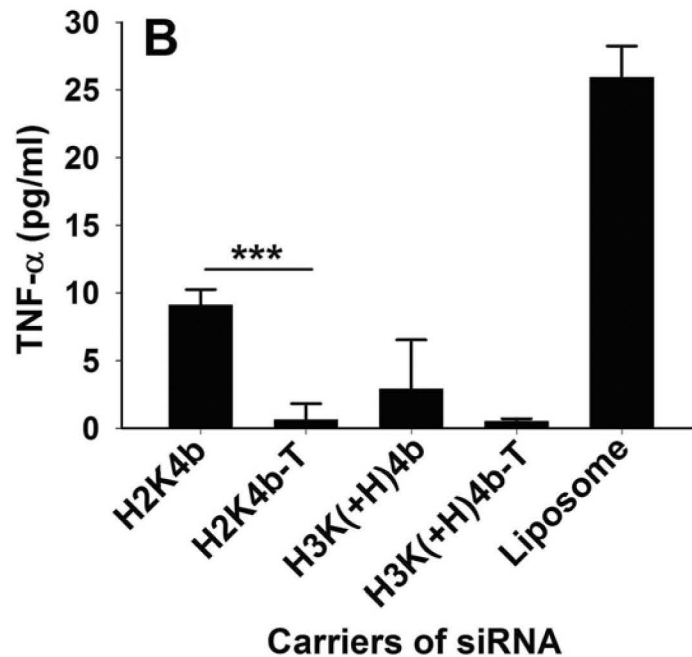

**Figure S3.** Histidine-Rich Tails on HK Peptides Reduced Levels IFN- $\gamma$  and TNF- $\alpha$  *in vivo*. In addition to the IFN- $\alpha$  and IL-6, the peptides with histidine rich tails in complex with VEGFR-2 siRNA induced cytokines (A, IFN- $\gamma$ ; B, TNF- $\alpha$ ) significantly less than the parent HK polyplexes. Vehicle alone values: IFN- $\gamma$ , undetectable, TNF- $\alpha$ , 1.2 pg/ml. \*,  $p < 0.05$ ; \*\*\*,  $p < 0.001$ , H2K4b vs. H2K4b-T; H3K(+H)4b vs H3K(+H)4b-T (t-test).
